# Supplementary material for: Characterization of tenascin-C as a novel biomarker for asthma: utility of tenascin-C in combination with periostin or immunoglobulin E
Source: Allergy Asthma Clin Immunol. 2018 Nov 19;14:72. doi: 10.1186/s13223-018-0300-7 (PMC6241046; doi:10.1186/s13223-018-0300-7)
Supplement: Supplementary file 2 — Additional file 2: Table S2. The statistical significance and confidence intervals for serum periostin and TNC levels with asthma severity and Th2-related variables. [file 13223_2018_300_MOESM2_ESM.xlsx]

## Sheet: Suppl Table S2
Table S2. The statistical significance and confidence intervals for serum periostin and TNC levels with asthma severity and Th2-related variables.
	Periostin (ng/mL)						TNC (ng/mL)
		95%CI						95%CI
	mean	low	high	CI for the difference	P value		mean	low	high	CI for the difference	P value
Asthma severity				-22.00 ～ -3.000	0.010 *					1.481 ～ 14.89	0.012 *
Mild to moderate asthma	94.62	85.36	103.89				31.705	26.407	37.003
Severe asthma	83.45	75.76	91.149				43.378	37.371	49.385
Th2-high/low				1.00 ～ 22.00	0.029 *					-4.57 ～ 8.41	0.6094
Th2-low	82.479	75.381	89.578				39.91	33.629	46.191
Th2-high	94.774	84.139	105.41				38.905	32.619	45.19
Serum IgE (IU/ mL)				-1.00 ～ 19.00	0.0746					0.972 ～ 13.64	0.026 *
Low IgE (≦100)	81.604	72.502	90.707				33.034	27.932	38.135
High IgE (>100)	91.372	83.259	99.484				43.459	37.085	49.832
Peripheral eosinophils (cells/μL)				3.00 ～ 22.00	0.010 *					-4.47 ～ 8.59	0.6282
Low eosinophil (<140)	78.063	71.096	83.905				40.877	32.164	49.59
High eosinophil (≧140)	93.551	89.568	109.81				38.632	33.703	43.56
FeNO (ppb)				9.00 ～ 28.00	<0.001 *					-2.29 ～ 10.60	0.2061
Low FeNO (<50)	77.382	70.859	83.905				36.818	31.312	42.324
High FeNO (≧50)	99.69	89.568	109.81				42.616	35.35	49.883
*P < 0.05.
Comparisons performed by Mann–Whitney U test.
CI, confidence intervals.
