# Supplementary material for: Characterization of tenascin-C as a novel biomarker for asthma: utility of tenascin-C in combination with periostin or immunoglobulin E
Source: Allergy Asthma Clin Immunol. 2018 Nov 19;14:72. doi: 10.1186/s13223-018-0300-7 (PMC6241046; doi:10.1186/s13223-018-0300-7)
Supplement: Supplementary file 6 — Additional file 6: Table S6. Omalizumab-treated patients to divide into 4 groups according to serum TNC and Periostin levels. [file 13223_2018_300_MOESM6_ESM.xlsx]

## Sheet: Suppl Table S6
Table S6. Omalizumab-treated patients to divide into 4 groups according to serum TNC and Periostin levels.
	High TNC > 37.16 High periostin > 95	Low TNC < 37.16 High periostin > 95	High TNC > 37.16 Low periostin < 95	Low TNC < 37.16 Low periostin < 95		Groups B, C and D	P value between groups A and E
	A (n = 7)	B (n = 1)	C (n = 6)	D (n = 7)		E (n = 14)
Improvement in FEV1 less than 12% (n = 16), n (%)	4 (25%)	1 (6.25%)	4 (25%)	7 (43.75%)		12	0.28
Improvement in FEV1 of at least 12% （n = 5）, n (%)	3 (60%)	0	2 (40%)	0		2
Comparisons performed by Fisher’s exact test.
